# Supplementary material for: Contrasting Dihydronaphthoquinone Patterns in Closely Related Drosera (Sundew) Species Enable Taxonomic Distinction and Identification
Source: MDPI journal article supplement (doi:10.3390/plants10081601), 2021-08-04
Supplement: s1 [file s1]

**Contrasting Dihydronaphthoquinone Patterns in Closely Related *Drosera* (Sundew) Species  
Enable Taxonomic Distinction and Identification**

**Jan Schlauer<sup>1</sup>, Siegfried R. H. Hartmeyer<sup>2</sup>, Irmgard Hartmeyer<sup>2</sup>, Tuulikki Seppänen-Laakso<sup>3</sup>,  
Heiko Rischer<sup>3</sup>**

**Affiliation**

<sup>1</sup> University of Tuebingen, ZMBP, Auf der Morgenstelle 32, D-72076 Tuebingen, Germany

<sup>2</sup> Wittlinger Str. 5, D-79576 Weil am Rhein, Germany

<sup>3</sup> VTT Technical Research Centre of Finland Ltd., Tietotie 2, FIN-02044 Espoo, Finland

**Correspondence**

***Jan Schlauer***

University of Tuebingen, ZMBP

Auf der Morgenstelle 32

D-72076 Tübingen

Germany

jan@carnivorousplants.org

***Heiko Rischer***

VTT Technical Research Centre of Finland Ltd.

Tietotie 2

FIN-02044 Espoo

Finland

heiko.rischer@vtt.fi

## Contents

**Fig. 1S.** MS of dihydroplumbagin (**5**).

**Fig. 2S.**MS of dihydroramentaceone (**6**).

**Fig. 3S.**MS of TMS derivative compound **1a**.

**Fig. 4S.**MS of TMS derivative compound **2a**.

**Fig. 5S.**MS of TMS derivative compound **3a**.

**Fig. 6S.**MS of TMS derivative compound **4a**.

**Fig. 7S.**MS of TMS derivative compound **5a**.

**Fig. 8S.**MS of TMS derivative compound **6a**.

**Fig. 9S.**MS of TMS derivative compound **7a**.

**Fig. 10S.**MS of TMS derivative compound **8a**.

**Fig. 11S.** TLC of extracts from selected *Drosera* species

**Table 1S.** MS Data of Identified Naphthoquinone Derivatives

**Fig. 1S.** MS of dihydroplumbagin (**5**).

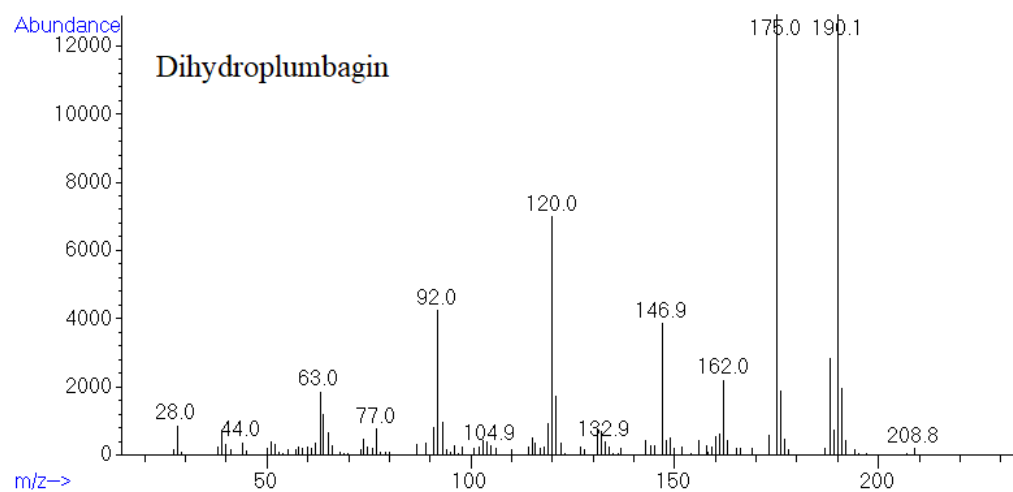

**Fig. 2S.** MS of dihydroramentaceone (**6**).

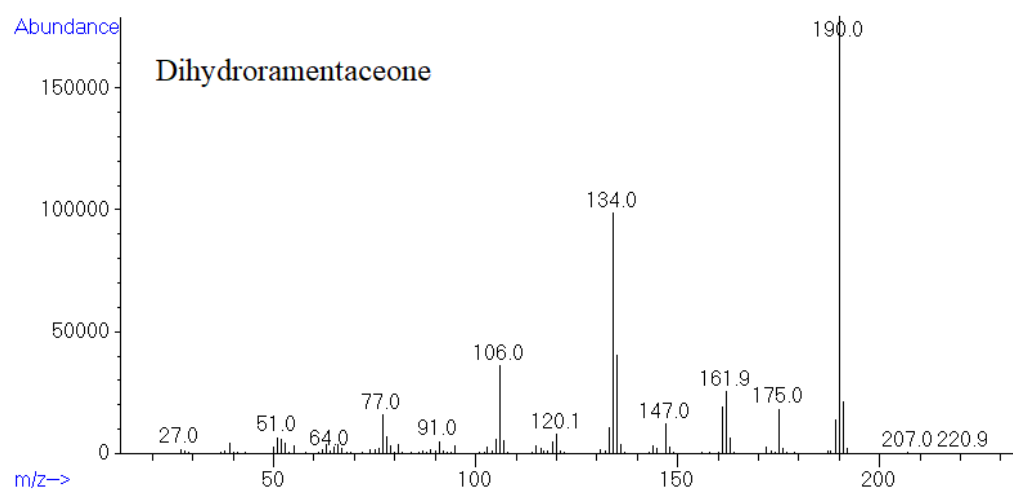

**Fig. 3S.** MS of TMS derivative compound **1a**.

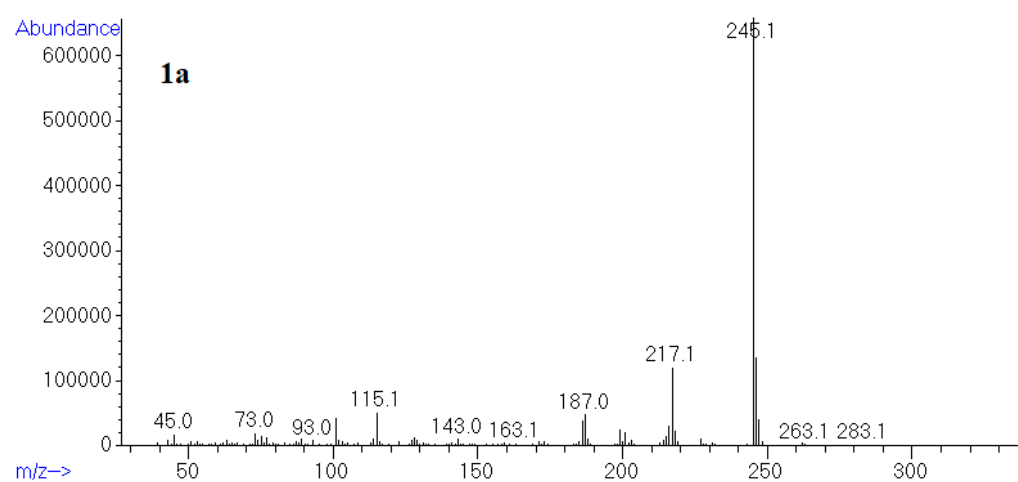

**Fig. 4S.** MS of TMS derivative compound **2a**.

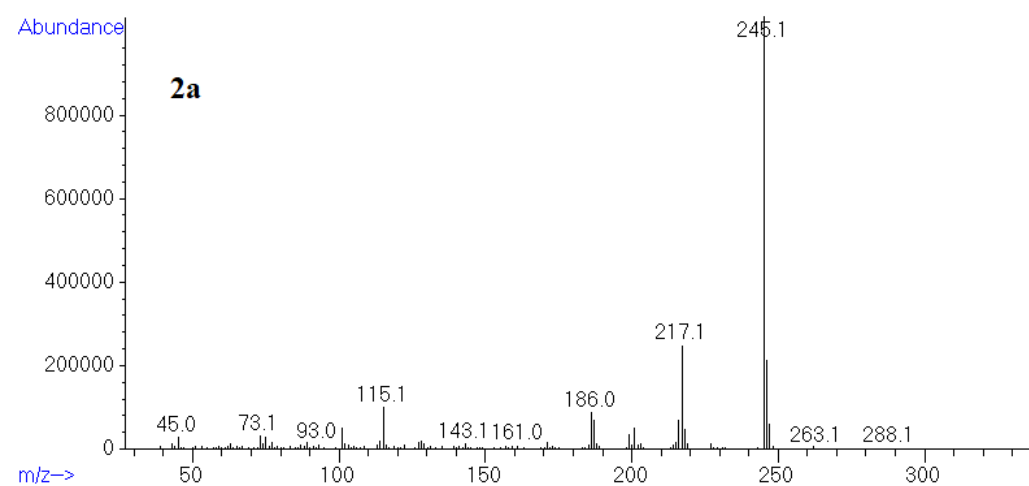

**Fig. 5S.** MS of TMS derivative compound **3a**.

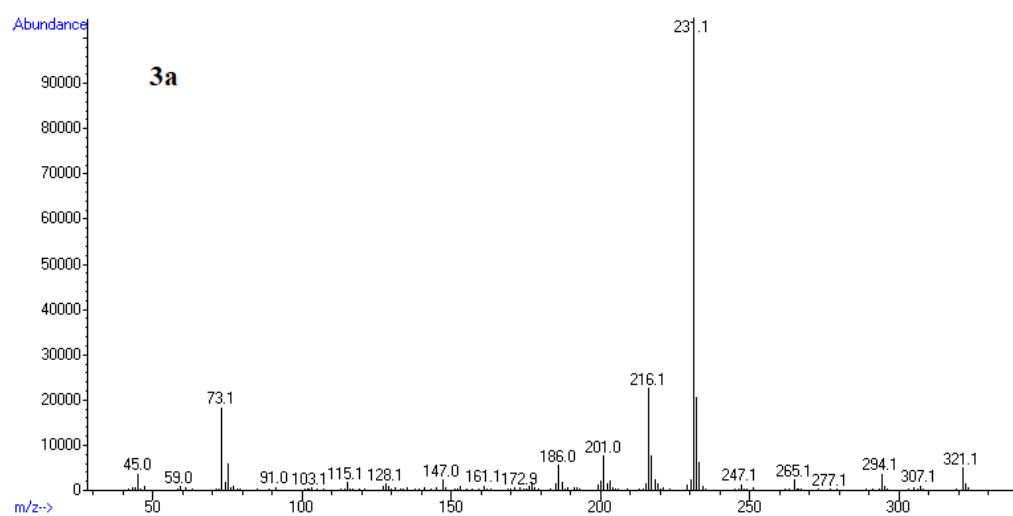

**Fig. 6S.** MS of TMS derivative compound **4a**.

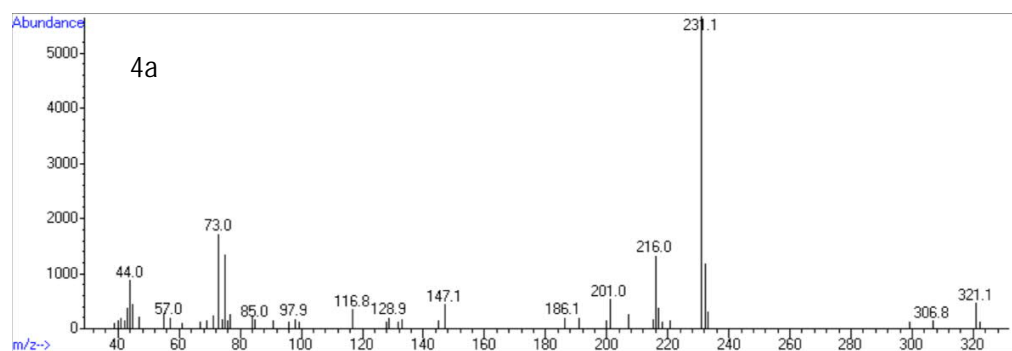

**Fig. 7S.** MS of TMS derivative compound **5a**.

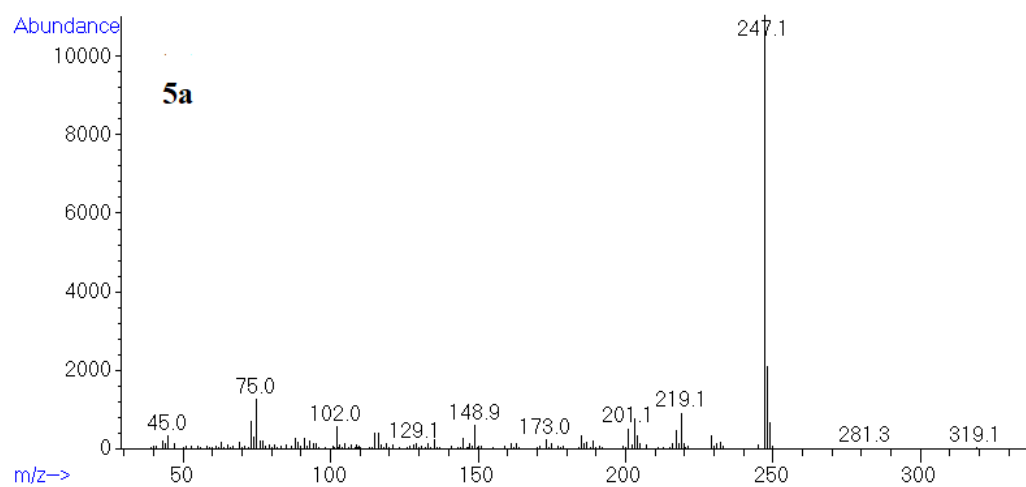

**Fig. 8S.** MS of TMS derivative compound **6a**.

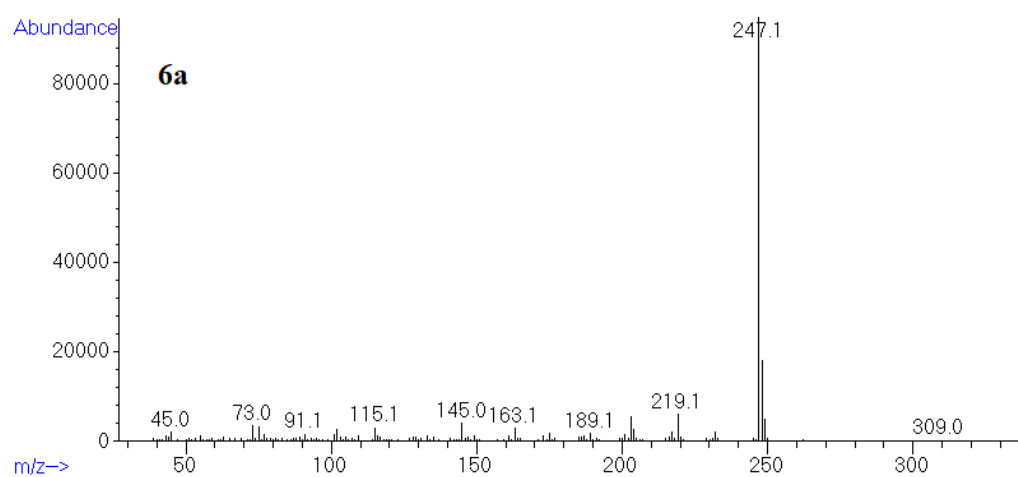

**Fig. 9S.** MS of TMS derivative compound **7a**.

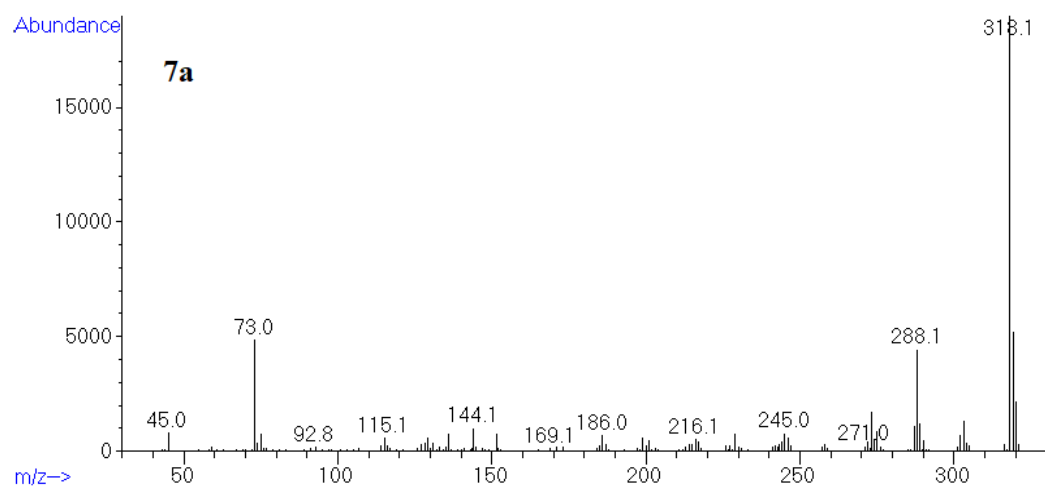

**Fig. 10S.** MS of TMS derivative compound **8a**.

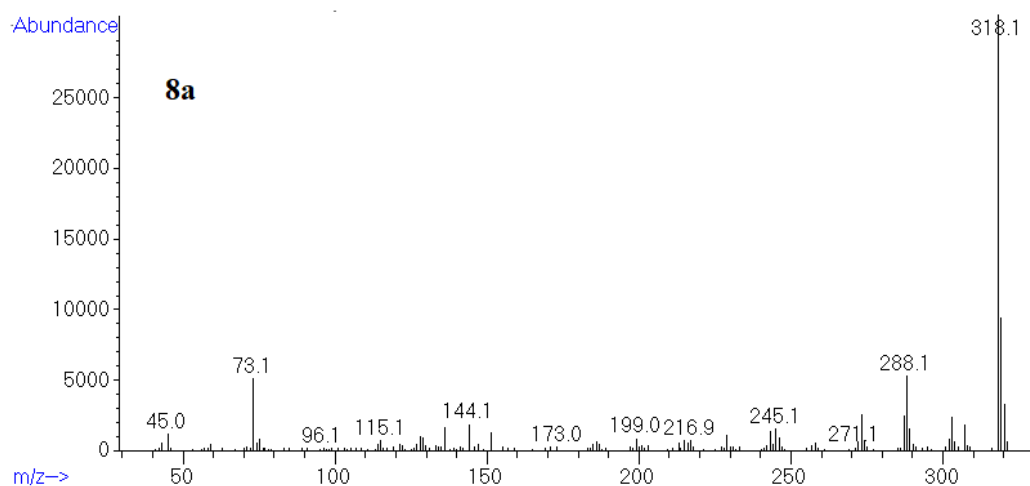

**Fig. 11S.** TLC of extracts from selected *Drosera* species

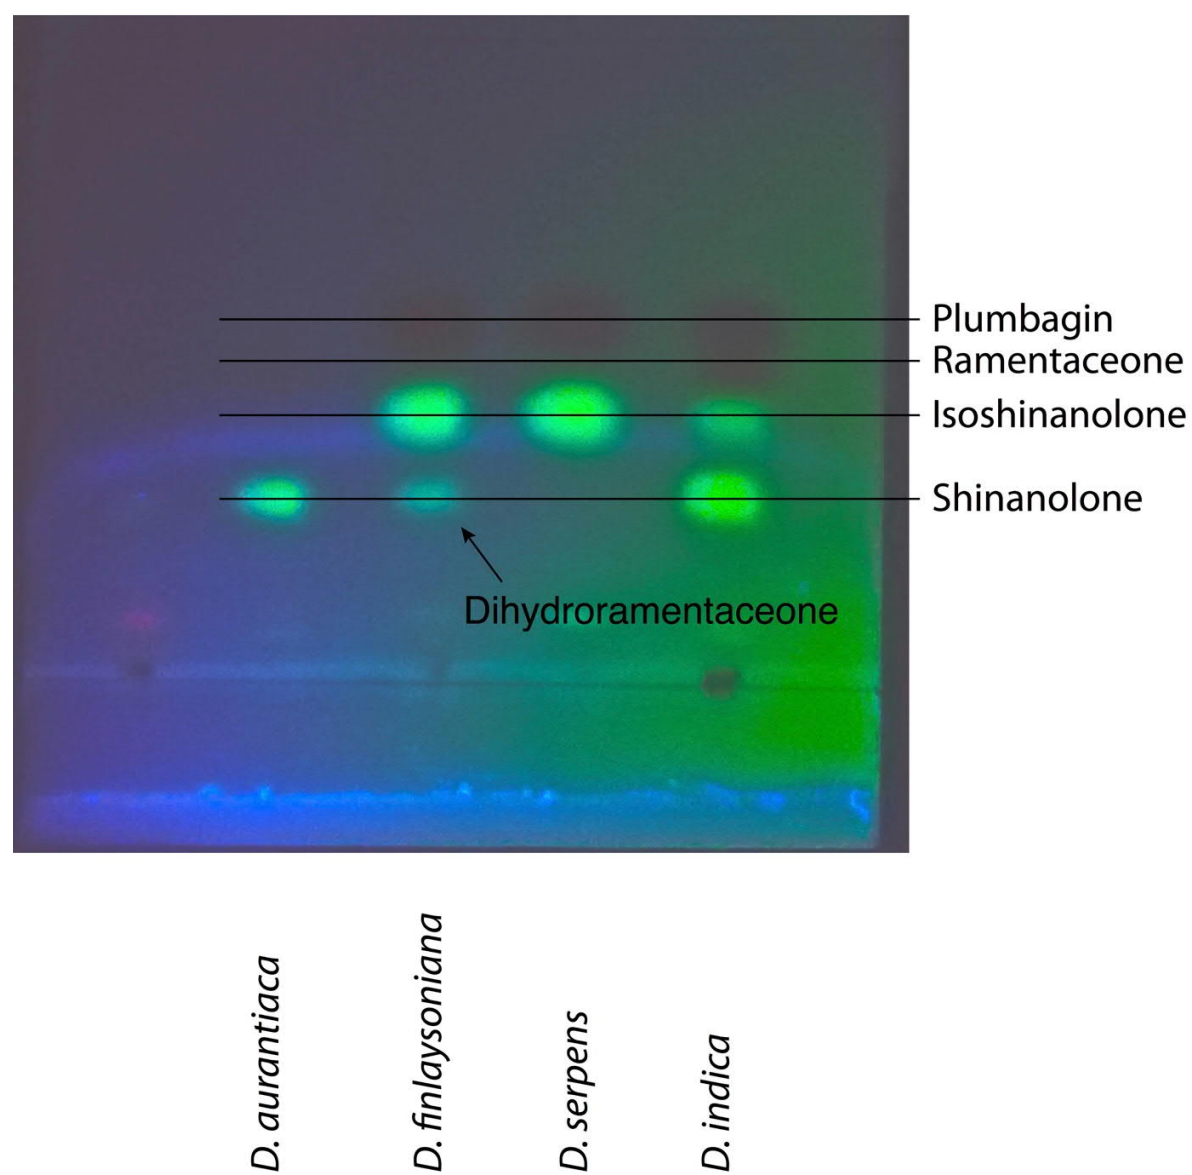



**Table 1S.** MS Data of Identified Naphthoquinone Derivatives

| Name (no.)                                                                     | Molecular formula                                              | EIMS $m/z$ (%) [interpretation]                                                                                                                                                                                                                                                                                                                                                                                                                                                                    |
|--------------------------------------------------------------------------------|----------------------------------------------------------------|----------------------------------------------------------------------------------------------------------------------------------------------------------------------------------------------------------------------------------------------------------------------------------------------------------------------------------------------------------------------------------------------------------------------------------------------------------------------------------------------------|
| <i>Plumbagin</i> ( <b>1</b> )                                                  | C <sub>11</sub> H <sub>8</sub> O <sub>3</sub>                  | 188 [M] <sup>+</sup> (100), 173 [M-CH <sub>3</sub> ] <sup>+</sup> (30), 160 [M-CO] <sup>+</sup> (25), 132 (30), 131 [M-C <sub>3</sub> H <sub>5</sub> O] <sup>+</sup> (50), 121 [M-C <sub>4</sub> H <sub>3</sub> O] <sup>+</sup> (15), 120 [M-C <sub>4</sub> H <sub>4</sub> O] <sup>+</sup> (25), 103 [M-C <sub>4</sub> H <sub>5</sub> O <sub>2</sub> ] <sup>+</sup> (10), 92 [M-C <sub>5</sub> H <sub>4</sub> O <sub>2</sub> ] <sup>+</sup> (40), 77 (15), 63 (40)                                 |
| <i>Ramentaceone</i> ( <b>2</b> )                                               | C <sub>11</sub> H <sub>8</sub> O <sub>3</sub>                  | 188 [M] <sup>+</sup> (100), 187 [M-H] <sup>+</sup> (30), 173 [M-CH <sub>3</sub> ] <sup>+</sup> (10), 160 [M-CO] <sup>+</sup> (15), 134 [M-C <sub>3</sub> H <sub>2</sub> O] <sup>+</sup> (20), 132 (30), 131 [M-C <sub>3</sub> H <sub>5</sub> O] <sup>+</sup> (30), 106 [M-C <sub>4</sub> H <sub>2</sub> O <sub>2</sub> ] <sup>+</sup> (20), 104 (10), 103 [M-C <sub>4</sub> H <sub>5</sub> O <sub>2</sub> ] <sup>+</sup> (10), 78 (15), 77 (25), 63 (15), 62 (10), 51 (25)                         |
| <i>Isoshinanolone</i> ( <b>3</b> )                                             | C <sub>11</sub> H <sub>12</sub> O <sub>3</sub>                 | 192 [M] <sup>+</sup> (70), 177 [M-CH <sub>3</sub> ] <sup>+</sup> (20), 174 [M-H <sub>2</sub> O] <sup>+</sup> (10), 150 [M-C <sub>3</sub> H <sub>6</sub> ] <sup>+</sup> (40), 149 [M-C <sub>2</sub> H <sub>3</sub> O] <sup>+</sup> (25), 131 [M-C <sub>2</sub> H <sub>5</sub> O <sub>2</sub> ] <sup>+</sup> (20), 122 [M-C <sub>3</sub> H <sub>2</sub> O <sub>2</sub> ] <sup>+</sup> (45), 121 [M-C <sub>4</sub> H <sub>7</sub> O] <sup>+</sup> (100), 115 (10), 93 (25), 77 (20), 65 (30), 51 (20) |
| <i>Shinanolone</i> ( <b>4</b> )                                                | C <sub>11</sub> H <sub>12</sub> O <sub>3</sub>                 | 192 [M] <sup>+</sup> (70), 177 [M-CH <sub>3</sub> ] <sup>+</sup> (10), 174 [M-H <sub>2</sub> O] <sup>+</sup> (10), 164 [M-C <sub>2</sub> H <sub>4</sub> ] <sup>+</sup> (20), 149 [M-C <sub>2</sub> H <sub>3</sub> O] <sup>+</sup> (15), 135 [M-C <sub>3</sub> H <sub>5</sub> O] <sup>+</sup> (100), 107 [M-C <sub>4</sub> H <sub>5</sub> O <sub>2</sub> ] <sup>+</sup> (20)                                                                                                                        |
| <i>Dihydroplumbagin</i> ( <b>5</b> )                                           | C <sub>11</sub> H <sub>10</sub> O <sub>3</sub>                 | 190 [M] <sup>+</sup> (85), 175 [M-CH <sub>3</sub> ] <sup>+</sup> (100), 162 [M-CO] <sup>+</sup> (20), 147 [M-C <sub>2</sub> H <sub>3</sub> O] <sup>+</sup> (20), 120 [M-C <sub>4</sub> H <sub>6</sub> O] <sup>+</sup> (60), 92 [M-C <sub>5</sub> H <sub>6</sub> O <sub>2</sub> ] <sup>+</sup> (40), 63 (15)                                                                                                                                                                                        |
| <i>Dihydroramentaceone</i> ( <b>6</b> )                                        | C <sub>11</sub> H <sub>10</sub> O <sub>3</sub>                 | 190 [M] <sup>+</sup> (100), 175 [M-CH <sub>3</sub> ] <sup>+</sup> (10), 162 [M-CO] <sup>+</sup> (15), 134 [M-C <sub>3</sub> H <sub>4</sub> O] <sup>+</sup> (55), 106 [M-C <sub>4</sub> H <sub>4</sub> O <sub>2</sub> ] <sup>+</sup> (20)                                                                                                                                                                                                                                                           |
| <i>5-O-Trimethylsilyl-plumbagin</i> ( <b>1a</b> )                              | C <sub>14</sub> H <sub>16</sub> O <sub>3</sub> Si              | 245 [M-CH <sub>3</sub> ] <sup>+</sup> (100), 217 [M-CH <sub>3</sub> -CO] <sup>+</sup> (30), 186 (10), 115 (10)                                                                                                                                                                                                                                                                                                                                                                                     |
| <i>5-O-Trimethylsilyl-ramentaceone</i> ( <b>2a</b> )                           | C <sub>14</sub> H <sub>16</sub> O <sub>3</sub> Si              | 245 [M-CH <sub>3</sub> ] <sup>+</sup> (100), 217 [M-CH <sub>3</sub> -CO] <sup>+</sup> (20), 187 (10), 115 (10)                                                                                                                                                                                                                                                                                                                                                                                     |
| <i>4,8-Di-(O-trimethylsilyl)-isoshinanolone</i> ( <b>3a</b> )                  | C <sub>17</sub> H <sub>28</sub> O <sub>3</sub> Si <sub>2</sub> | 321 [M-CH <sub>3</sub> ] <sup>+</sup> (5), 231 [M-CH <sub>3</sub> -C <sub>3</sub> H <sub>10</sub> OSi] <sup>+</sup> (100), 216 [M-2CH <sub>3</sub> -C <sub>3</sub> H <sub>10</sub> OSi] <sup>+</sup> (20), 201 [M-3CH <sub>3</sub> -C <sub>3</sub> H <sub>10</sub> OSi] <sup>+</sup> (10), 186 [M-4CH <sub>3</sub> -C <sub>3</sub> H <sub>10</sub> OSi] <sup>+</sup> (5)                                                                                                                           |
| <i>4,8-Di-(O-trimethylsilyl)-shinanolone</i> ( <b>4a</b> )                     | C <sub>17</sub> H <sub>28</sub> O <sub>3</sub> Si <sub>2</sub> | 321 [M-CH <sub>3</sub> ] <sup>+</sup> (5), 231 [M-CH <sub>3</sub> -C <sub>3</sub> H <sub>10</sub> OSi] <sup>+</sup> (100), 216 [M-2CH <sub>3</sub> -C <sub>3</sub> H <sub>10</sub> OSi] <sup>+</sup> (20), 201 [M-3CH <sub>3</sub> -C <sub>3</sub> H <sub>10</sub> OSi] <sup>+</sup> (10), 186 [M-4CH <sub>3</sub> -C <sub>3</sub> H <sub>10</sub> OSi] <sup>+</sup> (5)                                                                                                                           |
| <i>5-O-Trimethylsilyl-dihydroplumbagin</i> ( <b>5a</b> )                       | C <sub>14</sub> H <sub>18</sub> O <sub>3</sub> Si              | 247 [M-CH <sub>3</sub> ] <sup>+</sup> (100), 219 [M-CH <sub>3</sub> -CO] <sup>+</sup> (10)                                                                                                                                                                                                                                                                                                                                                                                                         |
| <i>5-O-Trimethylsilyl-dihydroramentaceone</i> ( <b>6a</b> )                    | C <sub>14</sub> H <sub>18</sub> O <sub>3</sub> Si              | 247 [M-CH <sub>3</sub> ] <sup>+</sup> (100), 219 [M-CH <sub>3</sub> -CO] <sup>+</sup> (10)                                                                                                                                                                                                                                                                                                                                                                                                         |
| <i>1,5-Di-(O-trimethylsilyl)-2-methyl-naphtho-1,4,5-triol</i> ( <b>7a</b> )    | C <sub>17</sub> H <sub>26</sub> O <sub>3</sub> Si <sub>2</sub> | 318 [M-CH <sub>4</sub> ] <sup>+</sup> (100), 288 [M-CH <sub>4</sub> -2CH <sub>3</sub> ] <sup>+</sup> (20), 273 [M-CH <sub>4</sub> -3CH <sub>3</sub> ] <sup>+</sup> (10)                                                                                                                                                                                                                                                                                                                            |
| <i>4,5-Di-(O-trimethylsilyl)-2-methyl-naphtho-1,4,5-triol</i> ( <b>7b</b> )    | C <sub>17</sub> H <sub>26</sub> O <sub>3</sub> Si <sub>2</sub> | 319 [M-CH <sub>3</sub> ] <sup>+</sup> (100), 245 (15), 217 (10)                                                                                                                                                                                                                                                                                                                                                                                                                                    |
| <i>2-Methyl-1,4,5-tri-(O-trimethylsilyl)-naphtho-1,4,5-triol</i> ( <b>7c</b> ) | C <sub>20</sub> H <sub>34</sub> O <sub>3</sub> Si <sub>3</sub> | 406 [M] <sup>+</sup> (100)                                                                                                                                                                                                                                                                                                                                                                                                                                                                         |
| <i>1,5-Di-(O-trimethylsilyl)-7-methyl-naphtho-1,4,5-triol</i> ( <b>8a</b> )    | C <sub>17</sub> H <sub>26</sub> O <sub>3</sub> Si <sub>2</sub> | 318 [M-CH <sub>4</sub> ] <sup>+</sup> (100), 288 [M-CH <sub>4</sub> -2CH <sub>3</sub> ] <sup>+</sup> (20), 273 [M-CH <sub>4</sub> -3CH <sub>3</sub> ] <sup>+</sup> (10)                                                                                                                                                                                                                                                                                                                            |
| <i>4,5-Di-(O-trimethylsilyl)-7-methyl-naphtho-1,4,5-triol</i> ( <b>8b</b> )    | C <sub>17</sub> H <sub>26</sub> O <sub>3</sub> Si <sub>2</sub> | 319 [M-CH <sub>3</sub> ] <sup>+</sup> (100), 245 (15), 217 (10)                                                                                                                                                                                                                                                                                                                                                                                                                                    |
| <i>7-Methyl-1,4,5-tri-(O-trimethylsilyl)-naphtho-1,4,5-triol</i> ( <b>8c</b> ) | C <sub>20</sub> H <sub>34</sub> O <sub>3</sub> Si <sub>3</sub> | 406 [M] <sup>+</sup> (100)                                                                                                                                                                                                                                                                                                                                                                                                                                                                         |
